# Supplementary material
Source: PubMed Central journal article supplement (PMC4598411)
Supplement: IAI.00498-15_zii999091438so1.pdf [file IAI.00498-15_zii999091438so1.pdf]

Fig. S1

A

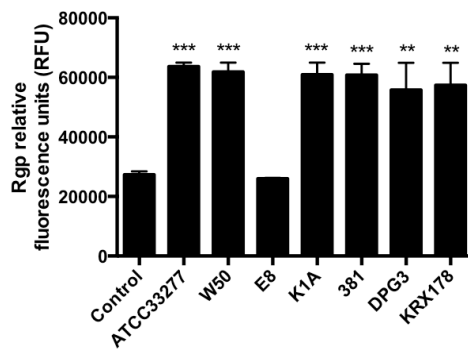

B

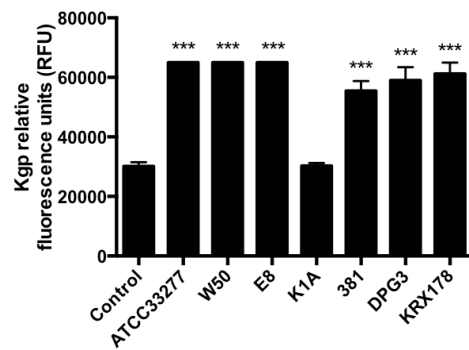

**Fig. S1.** Release of gingipain from different strains of *P. gingivalis*. Different strains of *P. gingivalis* were washed with KRG buffer and then suspended in cell culture medium at a concentration of  $10^6$  CFU. The relative concentration of Rgp (A) or Kgp (B) gingipains produced by different strains of *P. gingivalis* were determined by using gingipain arginine and lysine substrate, respectively. The cell culture medium with KRG buffer was served as control. \*\*,  $p < 0.005$ ; \*\*\*,  $p < 0.0001$ .  $n = 3$ .

Fig. S2

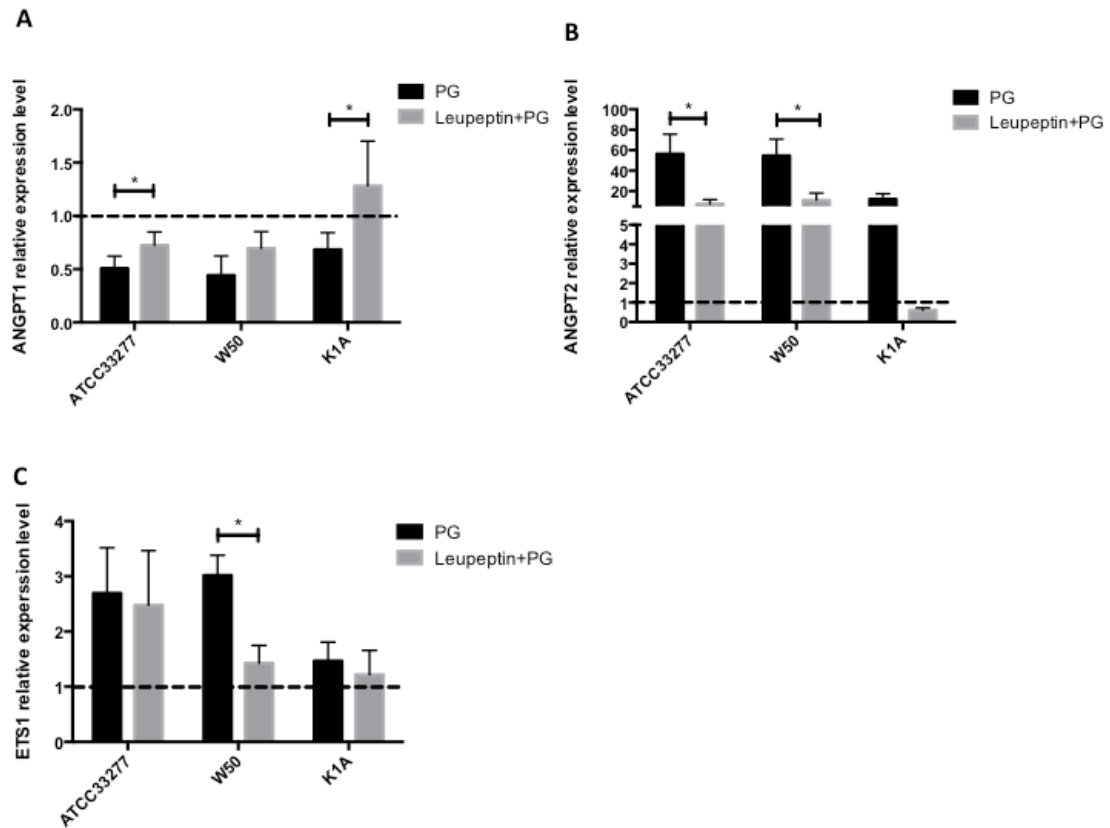

**Fig. S2.** Leupeptin inhibits *P. gingivalis* regulation of Angpt1, Angpt2, and ETS1 in AoSMCs. Before stimulating the cells, *P. gingivalis* ATCC 33277, W50, and K1A were incubated with or without 1mM of Leupeptin for 1h. Quantitative real-time PCR results demonstrate relative transcription for Angpt1 (A), Angpt2 (B), and ETS1 (C) of AoSMCs stimulated with 10 MOI of wild type *P. gingivalis* (ATCC 33077, W50), and Kgp mutant (K1A) for 24 h. All these results were normalized to the gene expression level of the housekeeping gene GAPDH. \*,  $p < 0.05$ . A-C,  $n = 4-5$ .

**Fig. S3**

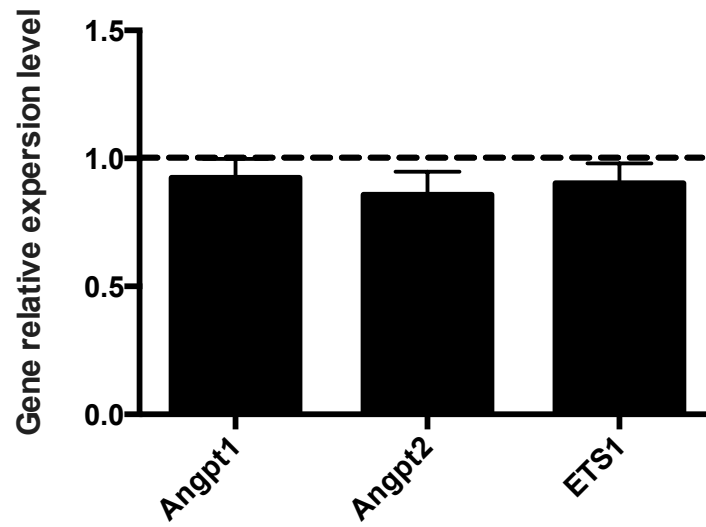

**Fig. S3.** *F. alocis* regulates Angpt1, Angpt2, and ETS1 gene expression in AoSMCs. Quantitative real-time PCR results demonstrate relative transcription for Angpt1, Angpt2, and ETS1 of AoSMCs stimulated with 10 MOI of *F. alocis* for 24 h. All these results were normalized to the gene expression level of the housekeeping gene GAPDH. n=5-7.

**Fig. S4**

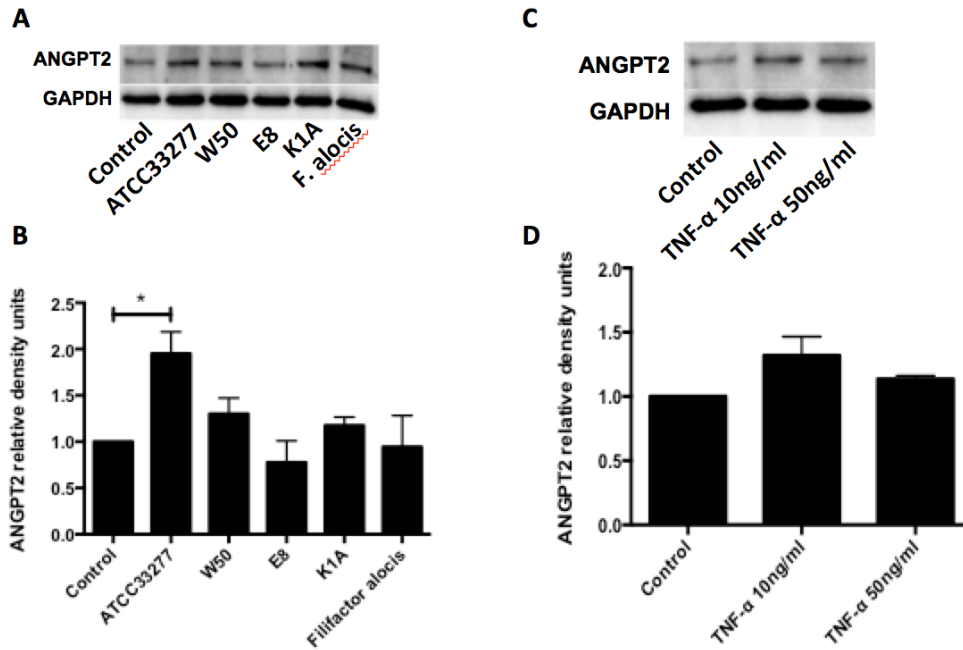

**Fig. S4.** *P. gingivalis* and TNF regulation of Angpt2 in AoSMCs after 24 h. Representative western blot showing Angpt2 protein expression levels of AoSMCs exposed to different *P. gingivalis* strains, *F. alocis* (A) at 10 MOI or TNF (C) at 10 ng/ml or 50 ng/ml for 24 h. Quantification of Angpt2 protein expression levels by densitometry is shown in (B) for *P. gingivalis* and *F. alocis* and in (D) for TNF. Angpt2 density signals were normalized to GAPDH signal values. \*,  $p < 0.05$ ; \*\*,  $p < 0.005$ ; \*\*\*,  $p < 0.0001$ . A, B,  $n = 4$ ; C-D,  $n = 3$ .

Fig. S5

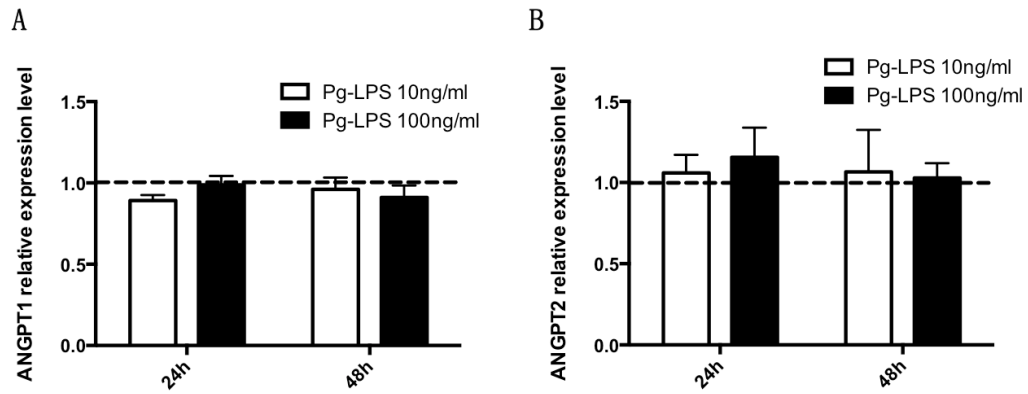

**Fig. S5.** LPS is not involved in *P. gingivalis* mediated regulation of Angpt1 and Angpt2 production in AoSMCs. The Angpt1 and Angpt2 gene expression level of AoSMCs stimulated with 10 ng/ml or 100 ng/ml of *P. gingivalis* LPS for 24 h or 48 h are shown in (A) and (B). All these results were normalized to the gene expression level of the housekeeping gene GAPDH. n=4.
